# Supplementary material
Source: HighWire-hosted journal article supplement (https://www.annfammed.org/highwire/filestream/7876/field_highwire_adjunct_files/0/Kong_Suppl_Fig.pdf)

**Online Supplementary Material**

Kong AS, Williams RL, Smilth M, et al. Acanthosis nigricans and diabetes risk factors: prevalence in young persons seen in southwestern US primary care practices. *Ann Fam Med*. 2007;5(3):202-208.

<http://www.annfammed.org/cgi/content/full/5/3/202/DC1>

---

**Supplemental Figure. Acanthosis nigricans on the posterior neck.**

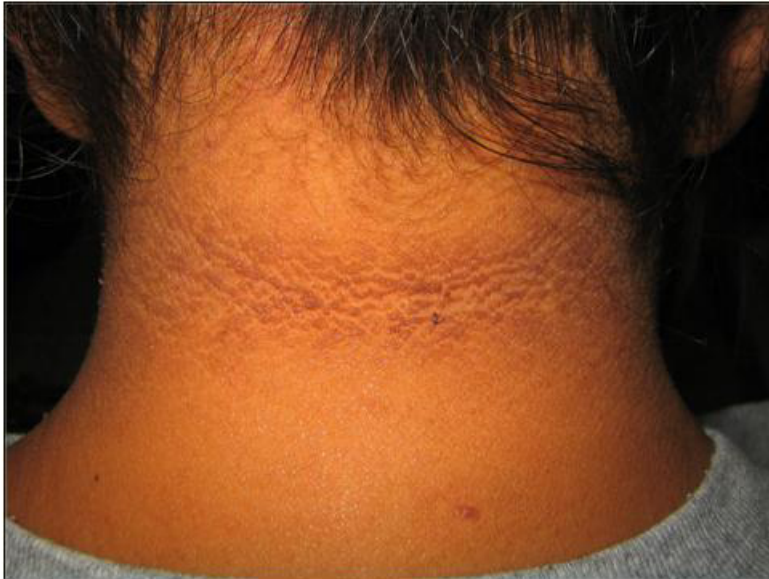

Supplement: Kong_Suppl_Fig.pdf [file Kong_Suppl_Fig.pdf]
